# Supplementary material
Source: ML conference proceedings conference paper supplement (https://openreview.net/forum?id=XSCYxDp3yE)
Supplement: supplementary_material [file attachment]

---

# A Bayesian Perspective On Training Data Attribution: Supplementary Material

---

Anonymous Author(s)

Affiliation

Address

email

## 1 A Model training details

2 We provide the source code anonymously for double-blind review at <https://anonymous.4open.science/r/bayesian-tda-14D6/> and in the attached zip file. We plan to make the repository  
3 public upon acceptance. All experiments were run on a single Nvidia 2080ti GPU.

### 5 A.1 Data sampling

6 We use subsampled versions of the openly available MNIST [1] and CIFAR10 [2] datasets. For this,  
7 we first add an index which we use for randomly sampling a fixed number of images from each class.  
8 Table 1 includes the dataset sizes of the different experiments.

### 9 A.2 Model training

10 The CNN has two convolutional layers followed by two fully connected linear layers, with GeLU  
11 activation. We use the Adam optimizer with a learning rate of 0.001 and a weight decay of 0.005.  
12 We use the cross-entropy loss and train the model for 15 epochs on MNIST3 and for 30 epochs  
13 on CIFAR10 with a batch size of 32. For training the ViT with LoRA, we use the `peft` [3] and  
14 HuggingFace `transformers` library [4]. We start from the pretrained model checkpoint of [5] and  
15 finetune the LoRA model with the same hyperparameters as the CNN.

16 An overview of the predictive performance measured in accuracy on the subsampled training and test  
17 sets is provided in Table 1.

18 **Hint for reproducibility.** In particular, we use `CrossEntropyLoss(reduction='none')` during  
19 model training and also update this in the ViT training script `modeling_vit.py`. This is important  
20 for the LOO experiments, where we exclude a sample  $z_j$  from contributing to the training by zeroing  
21 out the loss.

## 22 B Additional experimental results

23 We study the reliability of TDA estimates and values through a hypothesis test, where we report the  
24 p-values as an indication of the statistical significance of the TDA estimate. In this appendix, we  
25 provide a complete overview of the analyses of p-values and correlations between different TDA  
26 methods.

### 27 B.1 DE vs. DE+SWA

28 In our work, we sample trained models  $\theta$  sampled from the posterior  $p(\theta|\mathcal{D})$ . Concretely, we train the  
29 model across 10 different random seeds and record the checkpoints after each of the last five epochs

Table 1: Predictive performance at 95% CI across 10 runs (computed as  $1.96 \cdot \text{SE}$ )

| Experiment |         |              |                                |                               |                           |                          |
|------------|---------|--------------|--------------------------------|-------------------------------|---------------------------|--------------------------|
| Model      | Data    | Randomness   | $ \mathcal{D}_{\text{train}} $ | $ \mathcal{D}_{\text{test}} $ | Accuracy <sub>train</sub> | Accuracy <sub>test</sub> |
| CNN        | MNIST3  | SWA+DE-Init  | 30                             | 900                           | $0.987 \pm 0.010$         | $0.953 \pm 0.003$        |
| CNN        | MNIST3  | SWA+DE-Init  | 60                             | 900                           | $0.985 \pm 0.007$         | $0.970 \pm 0.004$        |
| CNN        | MNIST3  | SWA+DE-Init  | 150                            | 900                           | $0.998 \pm 0.004$         | $0.970 \pm 0.003$        |
| CNN        | CIFAR10 | SWA+DE-Init  | 100                            | 500                           | $0.989 \pm 0.020$         | $0.260 \pm 0.010$        |
| CNN        | CIFAR10 | SWA+DE-Init  | 200                            | 500                           | $1.000 \pm 0.000$         | $0.328 \pm 0.007$        |
| CNN        | CIFAR10 | SWA+DE-Init  | 500                            | 500                           | $0.992 \pm 0.014$         | $0.377 \pm 0.012$        |
| CNN        | MNIST3  | SWA+DE-Batch | 150                            | 900                           | $0.993 \pm 0.002$         | $0.975 \pm 0.002$        |
| CNN        | CIFAR10 | SWA+DE-Batch | 500                            | 500                           | $0.991 \pm 0.010$         | $0.364 \pm 0.003$        |
| ViT+LoRA   | MNIST3  | SWA+DE-Batch | 150                            | 900                           | $0.945 \pm 0.008$         | $0.935 \pm 0.005$        |
| ViT+LoRA   | CIFAR10 | SWA+DE-Batch | 500                            | 500                           | $0.934 \pm 0.006$         | $0.892 \pm 0.008$        |

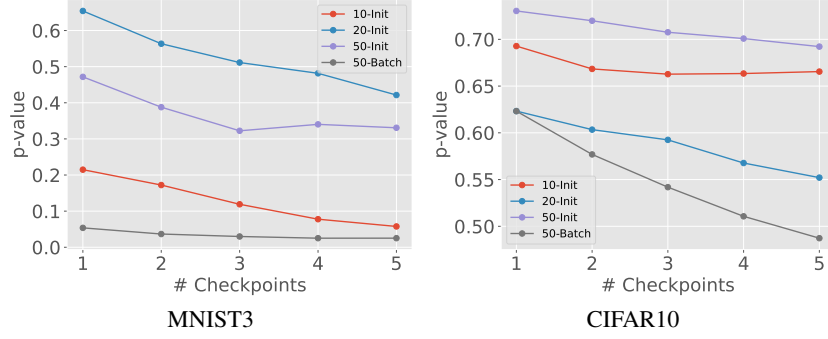

Figure 1: P-values of ground-truth TDA (LOO) with increasing number of SWA samples (i.e., number of model checkpoints used as samples of  $\theta$ ) for the CNN trained on MNIST3 and CIFAR10.

of training. Each of these models represents a sample. We test how the stability of the TDA values  $\tau(z_j, z)$  (LOO) behaves when we ensemble different numbers of checkpoints by investigating the mean p-values across all train-test pairs  $(z_j, z)$ . Figure 1 shows that higher numbers of samples  $\theta$  increase stability, therefore we use all available samples in our subsequent analyses.

## B.2 All results: Stability of TDA values and estimates

Table 2 presents the complete table of p-values of all tested TDA methods across all experiments of our work. Below, we display the histograms of p-values per experiment corresponding to each line in the table captioned with the experiment ID. The histograms show that low-noise train-test pairs  $(z_j, z)$  are present in all experiments involving the CNN model (i.e., experiments 1-8), where the number of pairs varies. Generally, we observe that there is no connection between the size of the dataset and the distribution of p-values. Furthermore, we notice that fixing the model initialisation (i.e., randomness induced by SWA+DE-Batch) increases the number of stable train-test pairs (cf. experiment 3 to 7, 4 to 8). However, in the case of the ViT experiments, stable train-test pairs are practically non-existent which shows that model complexity affects the stability of TDA.

## B.3 All results: Correlation analysis

In the main body of this paper, we report the Pearson and Spearman correlation matrices for experiment 3 (CNN trained on MNIST3 with 50 samples per class and randomness induced by SWA+DE-Init). This section presents the complete overview of correlations between TDA methods across all experiments in Figures 3 - 12. We note that the observations and analyses in the main paper hold across experiments.

Table 2: Complete list of mean p-values of TDA values for all experiments.

| Experiment |          |         |              |                                | LOO   | ATS   | IF    | GD    | GC    |
|------------|----------|---------|--------------|--------------------------------|-------|-------|-------|-------|-------|
| ID         | Model    | Data    | Randomness   | $ \mathcal{D}_{\text{train}} $ |       |       |       |       |       |
| 1          | CNN      | MNIST3  | SWA+DE-Init  | 30                             | 0.058 | 0.088 | 0.111 | 0.110 | 0.020 |
| 2          | CNN      | MNIST3  | SWA+DE-Init  | 60                             | 0.421 | 0.148 | 0.251 | 0.253 | 0.002 |
| 3          | CNN      | MNIST3  | SWA+DE-Init  | 150                            | 0.331 | 0.254 | 0.352 | 0.363 | 0.003 |
| 4          | CNN      | CIFAR10 | SWA+DE-Init  | 100                            | 0.665 | 0.424 | 0.607 | 0.608 | 0.352 |
| 5          | CNN      | CIFAR10 | SWA+DE-Init  | 200                            | 0.552 | 0.397 | 0.450 | 0.452 | 0.399 |
| 6          | CNN      | CIFAR10 | SWA+DE-Init  | 500                            | 0.692 | 0.438 | 0.575 | 0.587 | 0.356 |
| 7          | CNN      | MNIST3  | SWA+DE-Batch | 150                            | 0.025 | 0.039 | 0.000 | 0.000 | 0.000 |
| 8          | CNN      | CIFAR10 | SWA+DE-Batch | 500                            | 0.623 | 0.374 | 0.535 | 0.534 | 0.314 |
| 9          | ViT+LoRA | MNIST3  | SWA+DE-Batch | 150                            | 0.786 | 0.573 | 0.369 | 0.365 | 0.093 |
| 10         | ViT+LoRA | CIFAR10 | SWA+DE-Batch | 500                            | 0.777 | 0.766 | 0.686 | 0.686 | 0.522 |

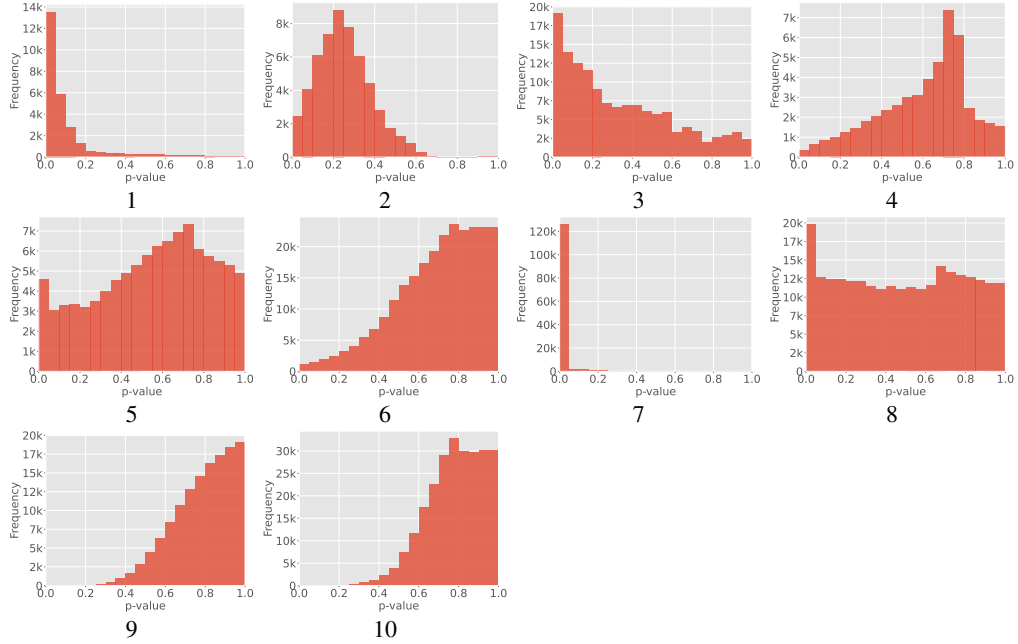

Figure 2: Distribution of p-values for ground-truth TDA (LOO) for all experiments (IDs corresponding to IDs in Table 2).

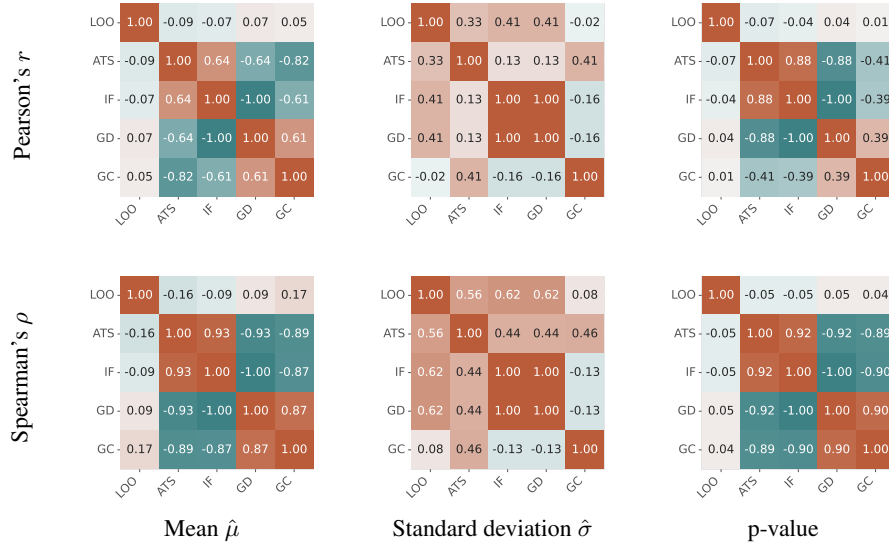

Figure 3: **Experiment 1 (cf. Table 2)**: Pearson and Spearman correlation coefficients among ground-truth TDA and approximate TDA methods. We show correlations for TDA mean  $\hat{\mu}$ , TDA standard deviation  $\hat{\sigma}$ , and TDA p-values.

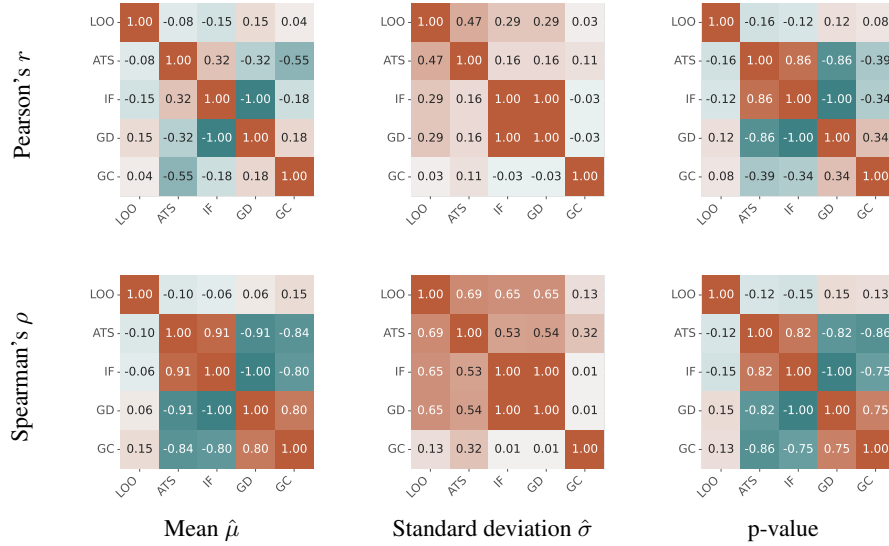

Figure 4: **Experiment 2 (cf. Table 2)**: Pearson and Spearman correlation coefficients among ground-truth TDA and approximate TDA methods. We show correlations for TDA mean  $\hat{\mu}$ , TDA standard deviation  $\hat{\sigma}$ , and TDA p-values.

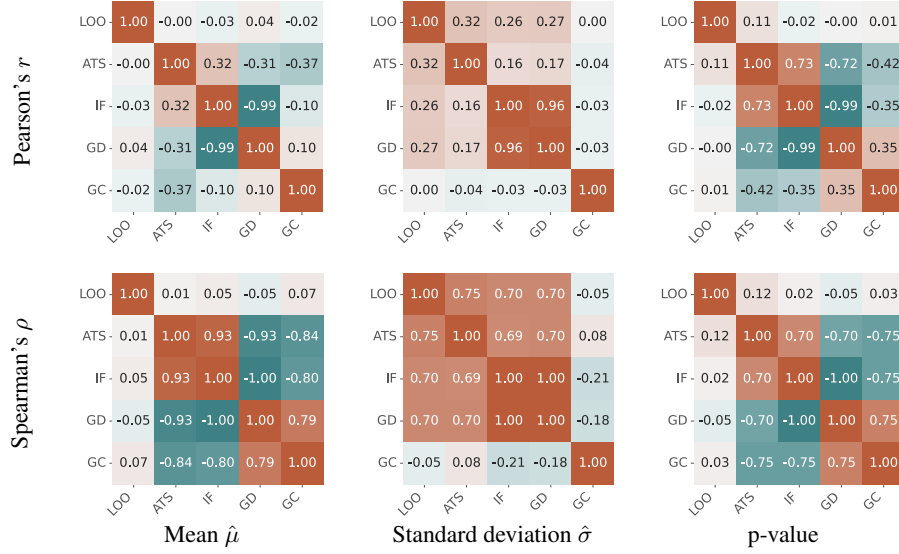

Figure 5: **Experiment 3 (cf. Table 2)**: Pearson and Spearman correlation coefficients among ground-truth TDA and approximate TDA methods. We show correlations for TDA mean  $\hat{\mu}$ , TDA standard deviation  $\hat{\sigma}$ , and TDA p-values.

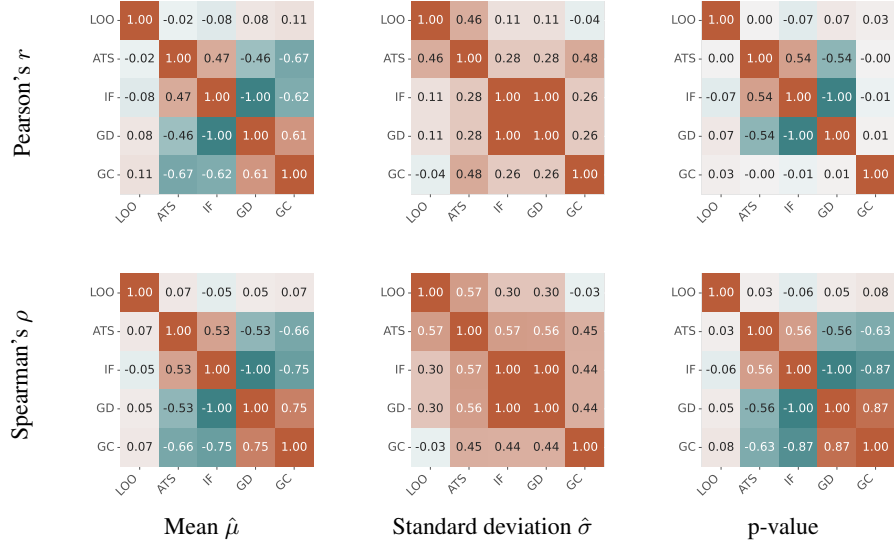

Figure 6: **Experiment 4 (cf. Table 2)**: Pearson and Spearman correlation coefficients among ground-truth TDA and approximate TDA methods. We show correlations for TDA mean  $\hat{\mu}$ , TDA standard deviation  $\hat{\sigma}$ , and TDA p-values.

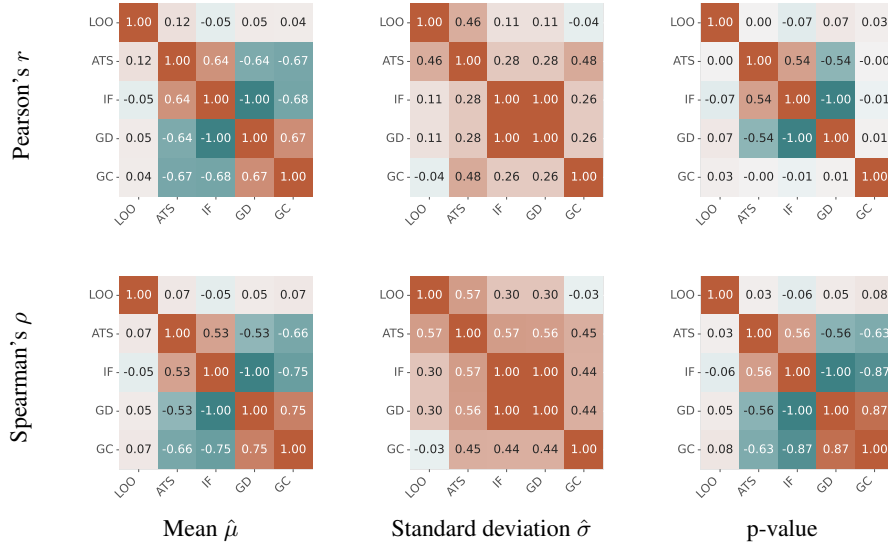

Figure 7: **Experiment 5 (cf. Table 2)**: Pearson and Spearman correlation coefficients among ground-truth TDA and approximate TDA methods. We show correlations for TDA mean  $\hat{\mu}$ , TDA standard deviation  $\hat{\sigma}$ , and TDA p-values.

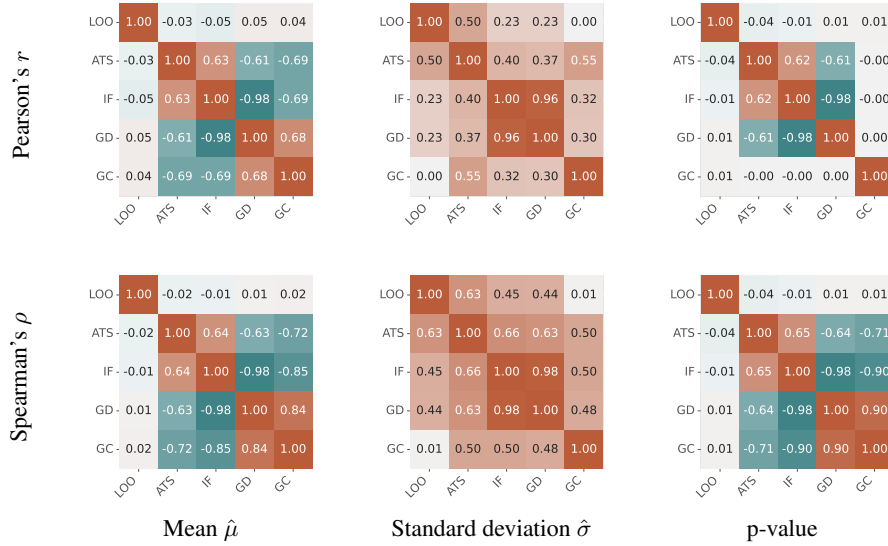

Figure 8: **Experiment 6 (cf. Table 2)**: Pearson and Spearman correlation coefficients among ground-truth TDA and approximate TDA methods. We show correlations for TDA mean  $\hat{\mu}$ , TDA standard deviation  $\hat{\sigma}$ , and TDA p-values.

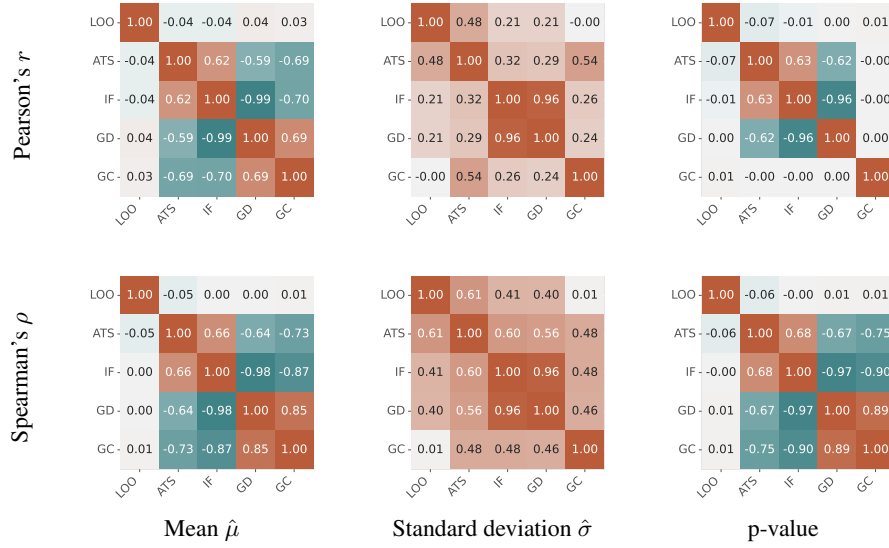

Figure 9: **Experiment 7 (cf. Table 2)**: Pearson and Spearman correlation coefficients among ground-truth TDA and approximate TDA methods. We show correlations for TDA mean  $\hat{\mu}$ , TDA standard deviation  $\hat{\sigma}$ , and TDA p-values.

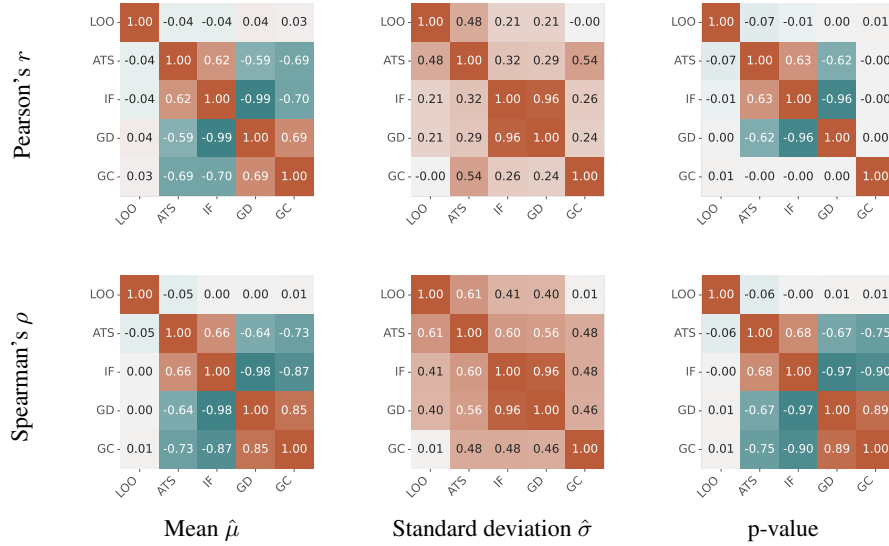

Figure 10: **Experiment 8 (cf. Table 2)**: Pearson and Spearman correlation coefficients among ground-truth TDA and approximate TDA methods. We show correlations for TDA mean  $\hat{\mu}$ , TDA standard deviation  $\hat{\sigma}$ , and TDA p-values.

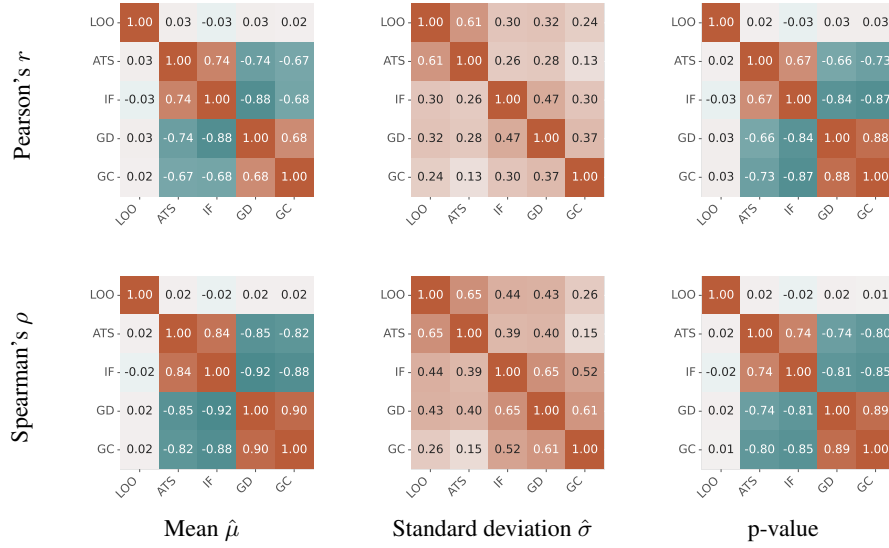

Figure 11: **Experiment 9 (cf. Table 2):** Pearson and Spearman correlation coefficients among ground-truth TDA and approximate TDA methods. We show correlations for TDA mean  $\hat{\mu}$ , TDA standard deviation  $\hat{\sigma}$ , and TDA p-values.

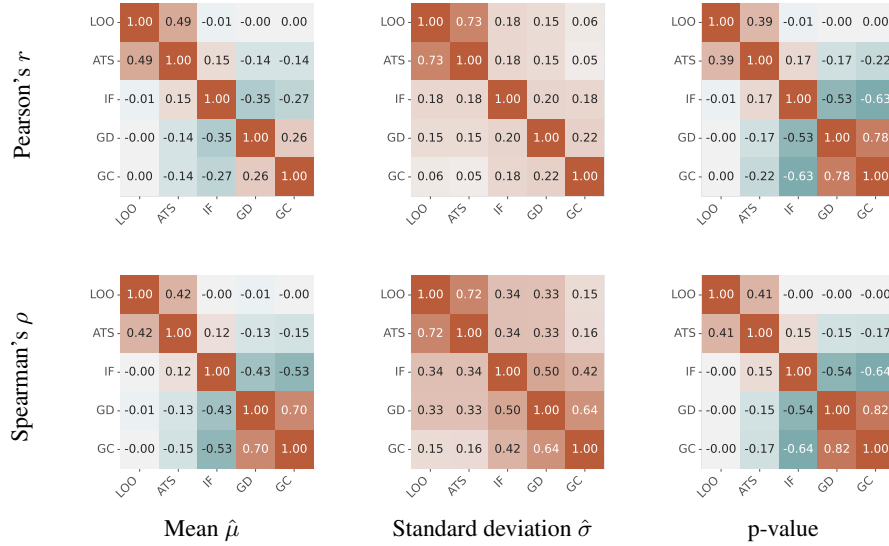

Figure 12: **Experiment 10 (cf. Table 2):** Pearson and Spearman correlation coefficients among ground-truth TDA and approximate TDA methods. We show correlations for TDA mean  $\hat{\mu}$ , TDA standard deviation  $\hat{\sigma}$ , and TDA p-values.



## 50 References

- 51 [1] Yann LeCun and Corinna Cortes. The mnist database of handwritten digits. 2005.
- 52 [2] Alex Krizhevsky. Learning multiple layers of features from tiny images. 2009.
- 53 [3] Sourab Mangrulkar, Sylvain Gugger, Lysandre Debut, Younes Belkada, and Sayak Paul.  
54 Peft: State-of-the-art parameter-efficient fine-tuning methods. <https://github.com/huggingface/peft>, 2022.
- 56 [4] Thomas Wolf, Lysandre Debut, Victor Sanh, Julien Chaumond, Clement Delangue, Anthony Moi,  
57 Pierric Cistac, Tim Rault, Rémi Louf, Morgan Funtowicz, Joe Davison, Sam Shleifer, Patrick  
58 von Platen, Clara Ma, Yacine Jernite, Julien Plu, Canwen Xu, Teven Le Scao, Sylvain Gugger,  
59 Mariama Drame, Quentin Lhoest, and Alexander M. Rush. Transformers: State-of-the-art  
60 natural language processing. In *Proceedings of the 2020 Conference on Empirical Methods in  
61 Natural Language Processing: System Demonstrations*, pages 38–45, Online, October 2020.  
62 Association for Computational Linguistics. URL [https://www.aclweb.org/anthology/  
63 2020.emnlp-demos](https://www.aclweb.org/anthology/2020.emnlp-demos). 6.
- 64 [5] Bichen Wu, Chenfeng Xu, Xiaoliang Dai, Alvin Wan, Peizhao Zhang, Zhicheng Yan, Masayoshi  
65 Tomizuka, Joseph Gonzalez, Kurt Keutzer, and Peter Vajda. Visual transformers: Token-based  
66 image representation and processing for computer vision, 2020.
